# Supplementary material for: Isochlorogenic Acid Glucosides from the Arabian Medicinal Plant Artemisia sieberi and Their Antimicrobial Activities
Source: MDPI journal article supplement (doi:10.3390/molecules28227460), 2023-11-07
Supplement: s1 [file s1]

## SUPPLEMENTARY MATERIAL

### **Isochlorogenic Acid Glucosides from the Arabian Medicinal Plant *Artemisia sieberi* and Their Antimicrobial Activities**

Khlood Jamal<sup>a</sup>, Areej M. Al-Taweel,<sup>b</sup> Sarah I. Bukhari,<sup>c</sup> Nadine M.S Moubayed,<sup>d</sup> Jawaher Al-Qahtani,<sup>b</sup> Orazio Tagliabatella-Scafati<sup>c</sup> and Shagufta Perveen<sup>f,\*</sup>

<sup>a</sup>*Department of Pharmacognosy, College of Clinical Pharmacy, Baha University. P. O. Box 26553, Taif, 8287, Kingdom of Saudi Arabia*

<sup>b</sup>*Department of Pharmacognosy, College of Pharmacy, King Saud University. P. O. Box 22452, Riyadh 11495, Kingdom of Saudi Arabia*

<sup>c</sup>*Department of Pharmaceutics, College of Pharmacy, King Saud University. P. O. Box 22452, Riyadh 11495, Kingdom of Saudi Arabia*

<sup>d</sup>*Department of Botany and Microbiology, College of Science, King Saud University, Riyadh 11495, Kingdom of Saudi Arabia*

<sup>e</sup>*Department of Pharmacy, School of Medicine and Surgery, University of Naples Federico II, Via Montesano 49, 80131 Naples, Italy*

<sup>f</sup>*Department of Chemistry, School of Computer, Mathematical and Natural Sciences, Morgan State University, Baltimore, MD 21251, USA*

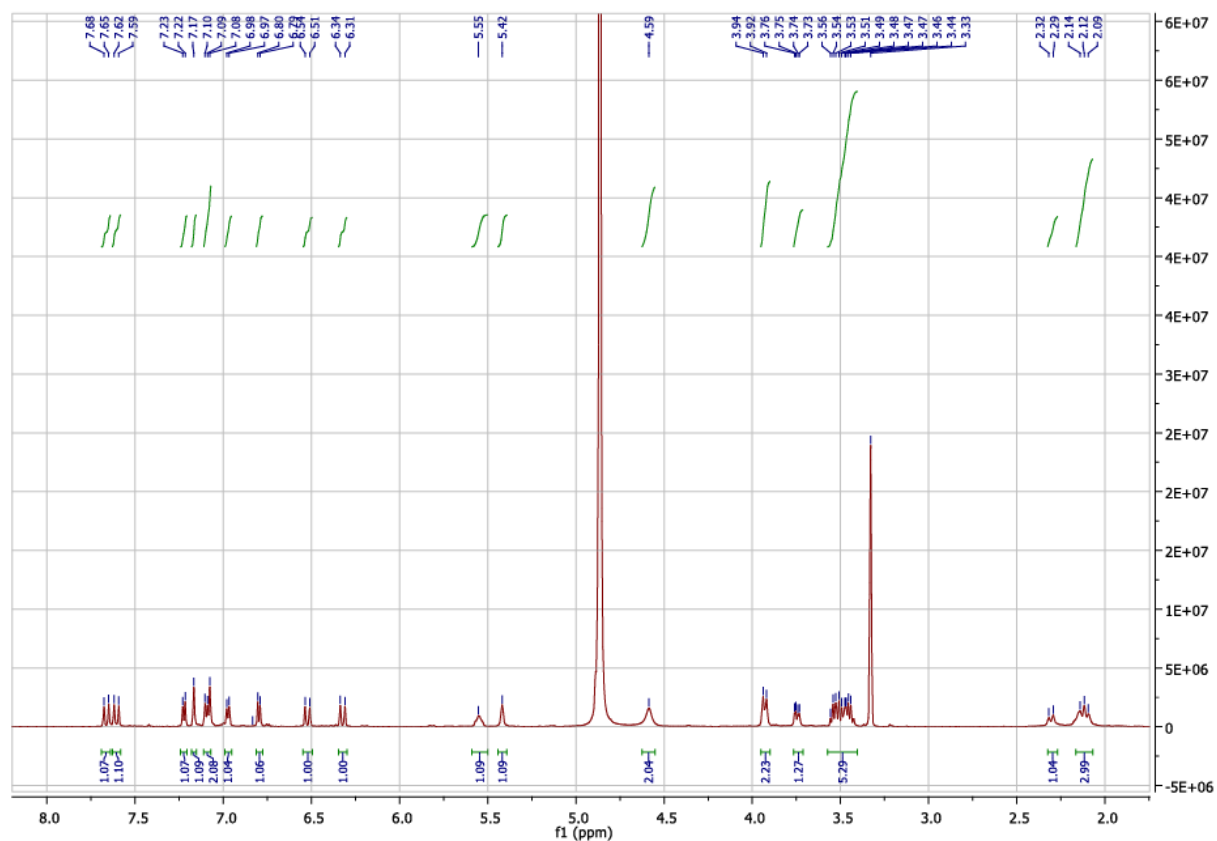

**Figure S1.** <sup>1</sup>H NMR spectrum of compound **1** in CD<sub>3</sub>OD

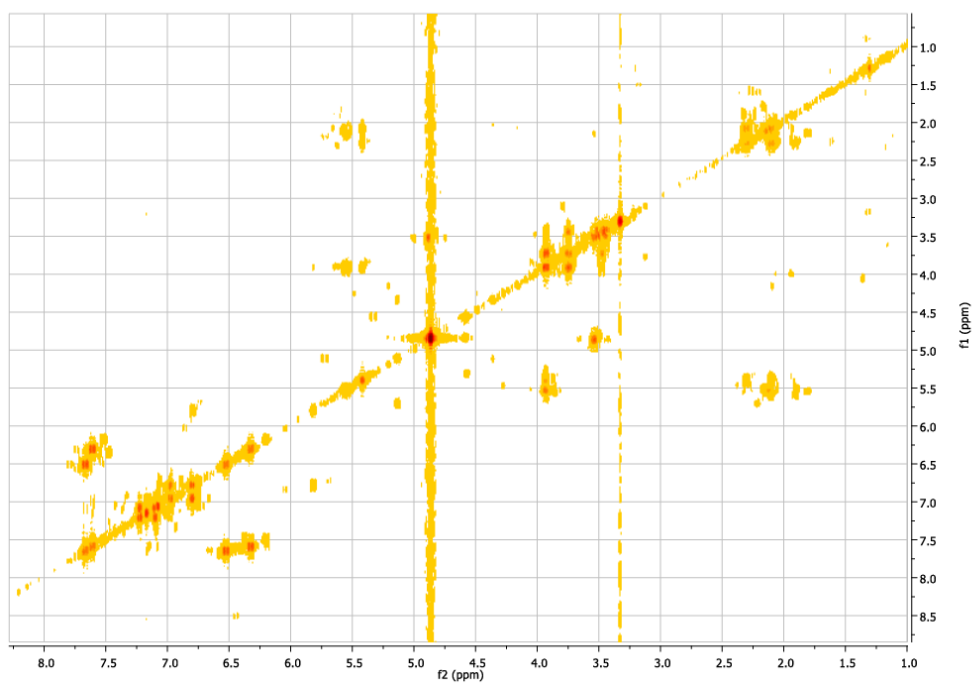

**Figure S2.** COSY NMR spectrum of compound **1** in CD<sub>3</sub>OD

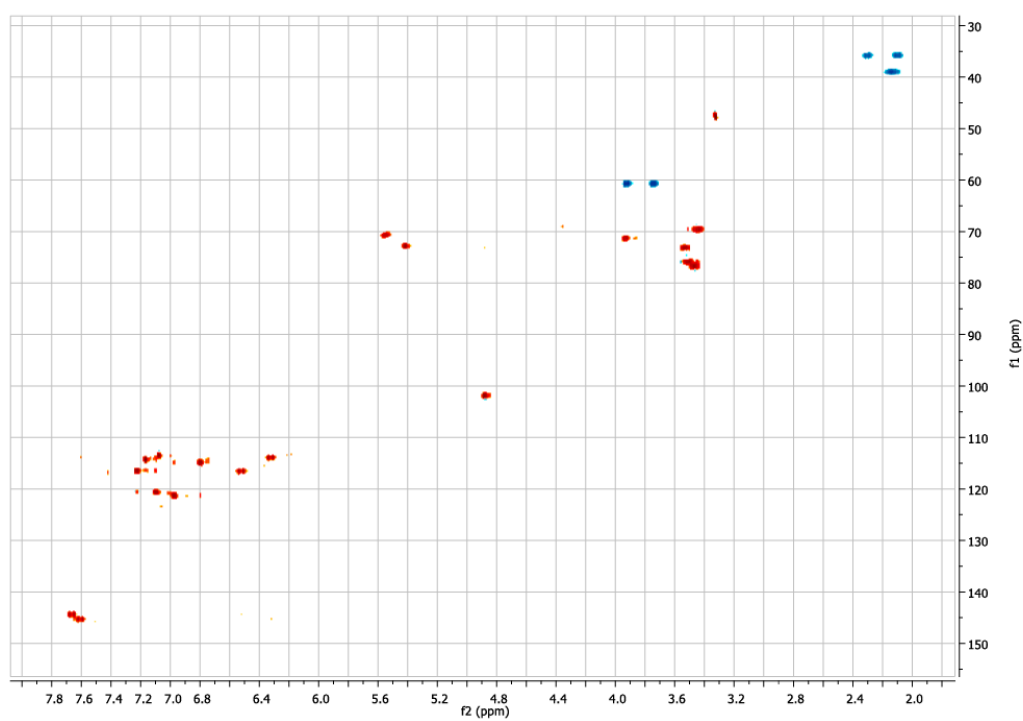

**Figure S3.** HSQC NMR spectrum of compound **1** in CD<sub>3</sub>OD

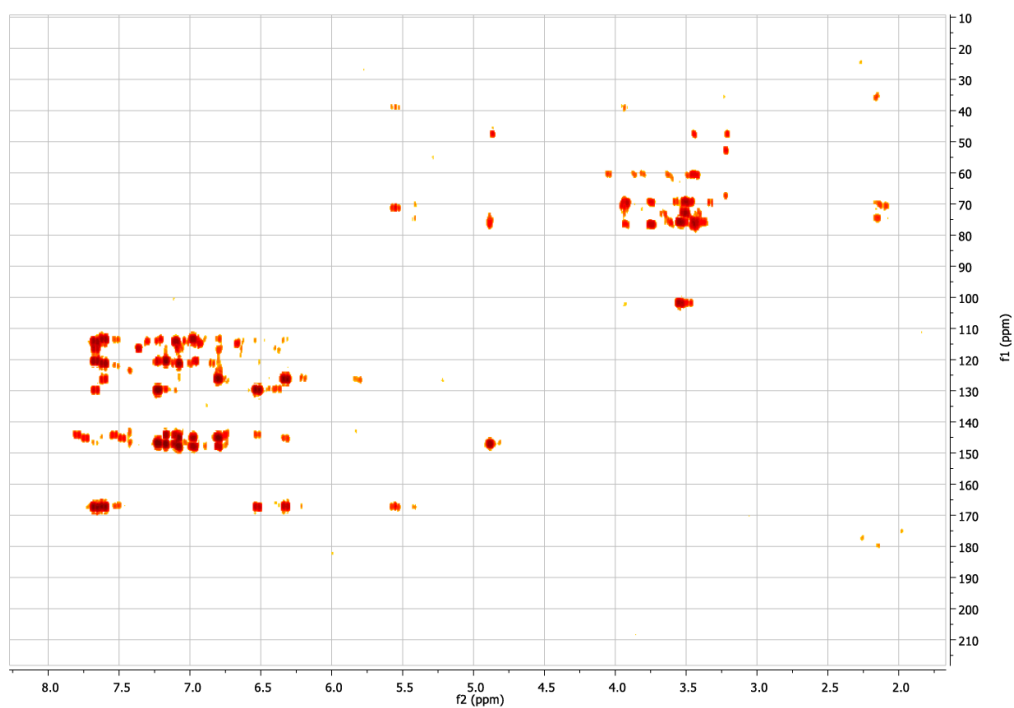

**Figure S4.** HMBC NMR spectrum of compound **1** in CD<sub>3</sub>OD

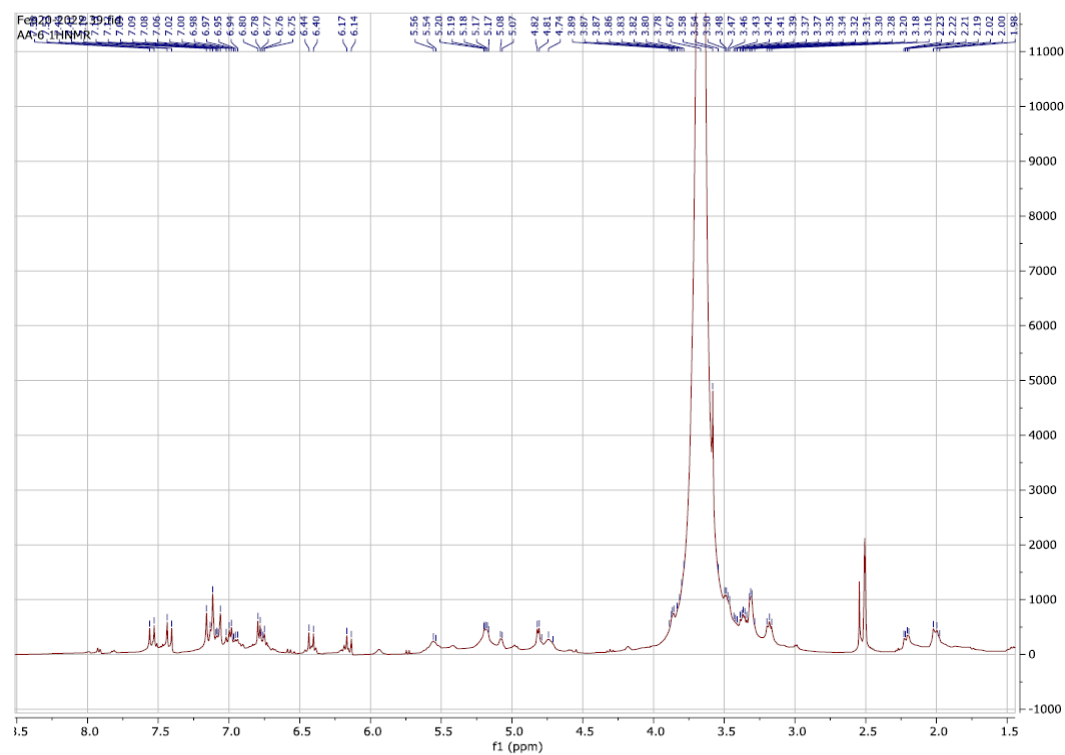

**Figure S5.**  $^1\text{H}$  NMR spectrum of compound **2** in  $\text{DMSO-d}_6$

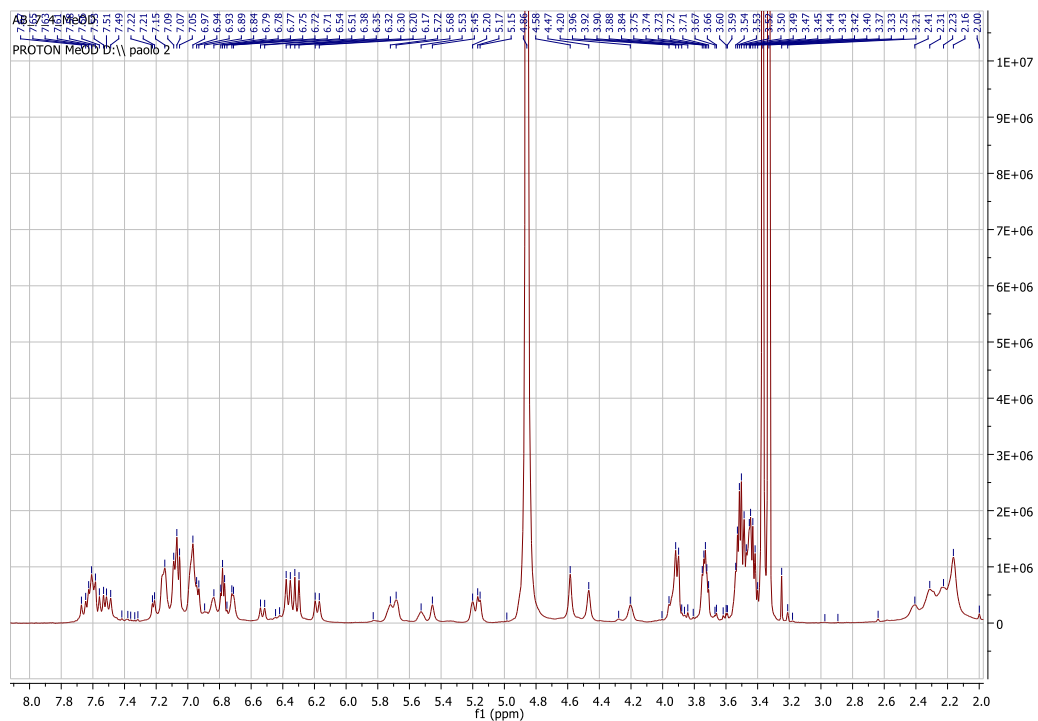

**Figure S6.**  $^1\text{H}$  NMR spectrum of compound **3** in  $\text{CD}_3\text{OD}$
